# Supplementary material
Source: MDPI journal article supplement (https://www.mdpi.com/2073-4433/14/10/1577)
Supplement: s1 [file s1]

Table S1. Details of CMIP6 models

| Model name    | Institution                                                                                                                                                                                                                                              |
|---------------|----------------------------------------------------------------------------------------------------------------------------------------------------------------------------------------------------------------------------------------------------------|
| ACCESS-CM2    | CSIRO (Commonwealth Scientific and Industrial Research Organization, Aspendale),<br>ARCCSS (Australian Research Council Centre of Excellence for Climate System Science)                                                                                 |
| ACCESS-ESM1-5 |                                                                                                                                                                                                                                                          |
| BCC-CSM2-MR   | Beijing Climate Center                                                                                                                                                                                                                                   |
| CanESM5-CanOE | Canadian Centre for Climate Modelling and Analysis, Environment and Climate<br>Change Canada                                                                                                                                                             |
| CanESM5       |                                                                                                                                                                                                                                                          |
| CESM2         | NCAR (National Center for Atmospheric Research, Climate and Global Dynamics<br>Laboratory)                                                                                                                                                               |
| CESM2-WACCM   |                                                                                                                                                                                                                                                          |
| CNRM-CM6-1    | CNRM (Centre National de Recherches Meteorologiques), CERFACS (Centre Europeen<br>de Recherche et de Formation Avancee en Calcul Scientifique)                                                                                                           |
| CNRM-CM6-1-HR |                                                                                                                                                                                                                                                          |
| CNRM-ESM2-1   |                                                                                                                                                                                                                                                          |
| EC-Earth3     | EC-Earth-Consortium, Europe-wide consortium                                                                                                                                                                                                              |
| EC-Earth3-Veg |                                                                                                                                                                                                                                                          |
| FGOALS-f3-L   | Chinese Academy of Sciences                                                                                                                                                                                                                              |
| FGOALS-g3     |                                                                                                                                                                                                                                                          |
| GFDL-CM4      | National Oceanic and Atmospheric Administration, Geophysical Fluid Dynamics<br>Laboratory                                                                                                                                                                |
| GFDL-ESM4     |                                                                                                                                                                                                                                                          |
| GISS-E2-1-G   | Goddard Institute for Space Studies                                                                                                                                                                                                                      |
| INM-CM4-8     | Institute for Numerical Mathematics, Russian Academy of Science                                                                                                                                                                                          |
| INM-CM5-0     |                                                                                                                                                                                                                                                          |
| IPSL-CM6A-LR  | Institute Pierre Simon Laplace                                                                                                                                                                                                                           |
| KACE-1-0-G    | National Institute of Meteorological Sciences/Korea Meteorological Administration,<br>Climate Research Division                                                                                                                                          |
| MCM-UA-1-0    | Consortium for Mathematics and Its Applications                                                                                                                                                                                                          |
| MIROC6        | JAMSTEC (Japan Agency for Marine-Earth Science and Technology), AORI<br>(Atmosphere and Ocean Research Institute, The University of Tokyo), NIES (National<br>Institute for Environmental Studies), and RCCS (RIKEN Center for Computational<br>Science) |
| MIROC-ES2L    |                                                                                                                                                                                                                                                          |
| MPI-ESM1-2-HR | Max Planck Institute for Meteorology, Germany                                                                                                                                                                                                            |

|               |                                                                                                                                                                                                                                    |
|---------------|------------------------------------------------------------------------------------------------------------------------------------------------------------------------------------------------------------------------------------|
| MPI-ESM1-2-LR | Max Planck Institute for Meteorology                                                                                                                                                                                               |
| MRI-ESM2-0    | Meteorological Research Institute, Japan                                                                                                                                                                                           |
| NESM3         | Nanjing University of Information Science and Technology                                                                                                                                                                           |
| NorESM2-LM    | NorESM Climate modeling Consortium consisting of CICERO (Center for International Climate and Environmental Research)                                                                                                              |
| NorESM2-MM    |                                                                                                                                                                                                                                    |
| UKESM1-0-LL   | Met Office Hadley Centre; Natural Environment Research Council; National Institute of Meteorological Sciences/Korea Meteorological Administration, Climate Research Division; National Institute of Water and Atmospheric Research |

---
